# Supplementary material for: Biochemical mechanisms determine the functional compatibility of heterologous genes
Source: PubMed Central journal article supplement (PMC5802803; doi:10.1038/s41467-018-02944-3), 2018-02-06
Supplement: 41467_2018_2944_MOESM3_ESM.pdf [file 41467_2018_2944_MOESM3_ESM.pdf]

## **Description of Additional Supplementary Files**

File Name: Supplementary Data 1

Description: Table containing sequences and information on all synthetic genes included in the study.
